# Supplementary material for: Microplastics in Widely Used Polypropylene-Made Food Containers
Source: MDPI journal article supplement (doi:10.3390/toxics10120762), 2022-12-07
Supplement: s1 [file s1]

## **SUPPORTING INFORMATION**

### **Microplastics in Widely Used Polypropylene-Made Food Containers**

Jun Hu <sup>1,2</sup>, Xin Xu <sup>1</sup>, Ying Song <sup>3</sup>, Wenqi Liu <sup>4</sup>, Jianqiang Zhu <sup>1</sup>, Hangbiao Jin <sup>1,\*</sup>,  
Zhu Meng <sup>1</sup>

<sup>1</sup>College of Environment, Zhejiang University of Technology, Hangzhou 310032,  
China;

<sup>2</sup>Innovation Research Center of Advanced Environmental Technology,  
Eco-Industrial Innovation Institute ZJUT, Quzhou 324018, China

<sup>3</sup>Quzhou Municipal Bureau of Ecology and Environment, Quzhou 324007, China

<sup>4</sup>Shaoxing Industrial Science Design Research Institute Co., Ltd. Hangzhou Branch,  
Hangzhou 310052, China

14 **Table S1. Information on Sampling Sites and Materials of Take-Out Food**  
15 **Containers.**

|                                      | Sampling site       |               | <i>n</i> | Recycling symbol                                                                    | Identification code                    |
|--------------------------------------|---------------------|---------------|----------|-------------------------------------------------------------------------------------|----------------------------------------|
| <b>Hangzhou</b><br>( <i>n</i> = 35)  | Shangcheng District | 6 restaurants | 10       |    | JQ-500;<br>B-T2;<br>#1422;<br>1RR-N    |
|                                      | Xihu District       | 9 restaurants | 14       |                                                                                     |                                        |
|                                      | Binjiang District   | 6 restaurants | 7        |                                                                                     |                                        |
|                                      | Gongshu District    | 3 restaurants | 4        |                                                                                     |                                        |
| <b>Xining</b><br>( <i>n</i> = 37)    | Chengdong District  | 7 restaurants | 13       |    | 2B3J;<br>JA-100;<br>JB-B2              |
|                                      | Chengxi District    | 9 restaurants | 12       |                                                                                     |                                        |
|                                      | Chengbei District   | 7 restaurants | 12       |                                                                                     |                                        |
| <b>Dalian</b><br>( <i>n</i> = 32)    | Zhongshan District  | 8 restaurants | 10       |    | A-10-B;<br>T-6;<br>G01                 |
|                                      | Xigang District     | 8 restaurants | 9        |                                                                                     |                                        |
|                                      | Shahekou District   | 6 restaurants | 13       |                                                                                     |                                        |
| <b>Qingdao</b><br>( <i>n</i> = 28)   | Laoshan District    | 5 restaurants | 11       |    | 0FFF;<br>La-4;<br>JBC                  |
|                                      | Shibei District     | 6 restaurants | 10       |                                                                                     |                                        |
|                                      | Licang District     | 6 restaurants | 7        |                                                                                     |                                        |
| <b>Guangzhou</b><br>( <i>n</i> = 21) | Baiyun District     | 4 restaurants | 5        |    | Qsd-3-1;<br>002;<br>B-T2;<br>24BD      |
|                                      | Tianhe District     | 5 restaurants | 6        |                                                                                     |                                        |
|                                      | Yuexiu District     | 6 restaurants | 6        |                                                                                     |                                        |
|                                      | Huadu District      | 2 restaurants | 4        |                                                                                     |                                        |
| <b>Chengdu</b><br>( <i>n</i> = 27)   | Jinniu District     | 4 restaurants | 6        |    | 230;<br>ID-D;<br>JA-100;<br>9W2        |
|                                      | Qingyang District   | 4 restaurants | 6        |                                                                                     |                                        |
|                                      | Wuhou District      | 3 restaurants | 7        |                                                                                     |                                        |
|                                      | Gaoxin District     | 5 restaurants | 8        |                                                                                     |                                        |
| <b>Shanghai</b><br>( <i>n</i> = 30)  | Huangpu District    | 5 restaurants | 10       |  | QQ-LID;<br>G1-0-f;<br>US-78;<br>H-22JB |
|                                      | Xuhui District      | 7 restaurants | 10       |                                                                                     |                                        |
|                                      | Pudong District     | 2 restaurants | 4        |                                                                                     |                                        |
|                                      | Hongkou District    | 5 restaurants | 6        |                                                                                     |                                        |

16 **Table S2. Percentage (%; Mean, Range) of Different Shape, Size, Color, and**  
17 **Composition of Microplastics in Take-Out Food Containers Collected from**  
18 **Chinese Cities.**

| Shape        | Chengdu         | Xining          | Dalian         | Qingdao        | Guangzhou       | Hangzhou       | Shanghai       |
|--------------|-----------------|-----------------|----------------|----------------|-----------------|----------------|----------------|
| Fiber        | 75<br>63–81     | 83<br>73–90     | 71<br>60–84    | 87<br>59–91    | 76<br>56–88     | 66<br>59–72    | 68<br>50–84    |
| Fragment     | 18<br>10–26     | 14<br>8.1–20    | 23<br>11–30    | 6.2<br>4.2–9.3 | 17<br>12–24     | 28<br>20–37    | 25<br>10–31    |
| Film         | 7.1<br>4.6–9.1  | 3.7<br>1.3–5.0  | 6.3<br>3.5–9.6 | 6.5<br>4.7–10  | 7.2<br>4.9–9.5  | 5.7<br>3.6–9.4 | 6.9<br>5.3–8.7 |
| Size (μm)    | Chengdu         | Xining          | Dalian         | Qingdao        | Guangzhou       | Hangzhou       | Shanghai       |
| 50–100       | 12<br>7.5–17    | 14<br>10–18     | 9.9<br>6.5–13  | 11<br>8.4–15   | 12<br>7.9–16    | 8.7<br>4.4–13  | 9.6<br>6.0–13  |
| 101–200      | 20<br>14–25     | 22<br>19–24     | 17<br>13–22    | 30<br>15–34    | 19<br>12–23     | 22<br>13–24    | 30<br>25–34    |
| 201–500      | 42<br>33–50     | 42<br>36–41     | 37<br>30–45    | 26<br>22–31    | 37<br>34–41     | 37<br>34–42    | 34<br>30–39    |
| 501–1000     | 23<br>17–34     | 16<br>12–19     | 25<br>17–29    | 25<br>22–29    | 23<br>19–28     | 21<br>17–25    | 18<br>13–22    |
| > 1000       | 3.9<br>2.0–5.6  | 6.4<br>4.7–8.5  | 13<br>10–17    | 7.7<br>4.8–9.0 | 10<br>7.9–13    | 11<br>8.7–15   | 8.7<br>5.3–11  |
| Color        | Guangzhou       | Hangzhou        | Chengdu        | Dalian         | Shanghai        | Xining         | Qingdao        |
| Transparent  | 65<br>60–71     | 73<br>68–77     | 41<br>35–45    | 56<br>51–62    | 70<br>61–74     | 42<br>39–46    | 39<br>34–43    |
| White        | 21<br>17–24     | 22<br>17–26     | 20<br>15–24    | 17<br>14–22    | 23<br>20–27     | 12<br>10–15    | 29<br>24–36    |
| Blue         | 9.1<br>6.6–14   | 1.2<br>0.47–2.6 | 11<br>6.9–15   | 17<br>13–20    | 1.1<br>0.56–1.6 | 15<br>12–17    | 9.3<br>6.4–15  |
| Black        | 3.8<br>1.9–5.5  | 3.6<br>2.0–5.2  | 20<br>12–23    | 8.3<br>6.1–11  | 4.0<br>1.9–5.9  | 22<br>16–24    | 18<br>12–28    |
| Yellow       | 1.4<br>0.87–1.6 | 0<br>0          | 7.4<br>4.2–11  | 3.2<br>1.9–5.2 | 1.6<br>0.88–3.3 | 8.6<br>4.7–11  | 5.2<br>3.5–7.0 |
| Composition  | Guangzhou       | Hangzhou        | Chengdu        | Dalian         | Shanghai        | Xining         | Qingdao        |
| PP           | 65<br>61–70     | 73<br>70–75     | 61<br>58–66    | 56<br>52–64    | 70<br>66–75     | 72<br>67–78    | 59<br>55–65    |
| PE           | 15<br>12–19     | 19<br>15–24     | 5.5<br>4.1–7.8 | 6.4<br>4.4–8.0 | 20<br>17–22     | 4.8<br>2.9–6.3 | 12<br>10–14    |
| Polyester    | 8.9<br>6.1–11   | 1.5<br>0.50–2.6 | 9.4<br>5.3–15  | 17<br>12–21    | 1.1<br>0.46–1.7 | 5.1<br>2.6–8.1 | 9.9<br>6.4–13  |
| Polystyrene  | 3.4<br>1.0–5.5  | 4.8<br>2.5–7.8  | 7.6<br>3.9–11  | 8.2<br>4.7–13  | 4.5<br>2.2–6.4  | 3.4<br>2.6–4.0 | 3.0<br>1.2–4.4 |
| polyurethane | 2.6<br>1.1–4.2  | 0<br>0          | 8.2<br>4.9–11  | 3.0<br>1.1–4.7 | 1.8<br>1.0–2.4  | 9.3<br>5.7–11  | 5.3<br>2.8–7.7 |
| Others       | 4.7<br>2.3–6.6  | 1.7<br>1.0–2.3  | 8.1<br>4.7–14  | 9.3<br>6.6–15  | 2.4<br>1.0–4.1  | 5.5<br>2.5–7.9 | 11<br>8.5–16   |

19

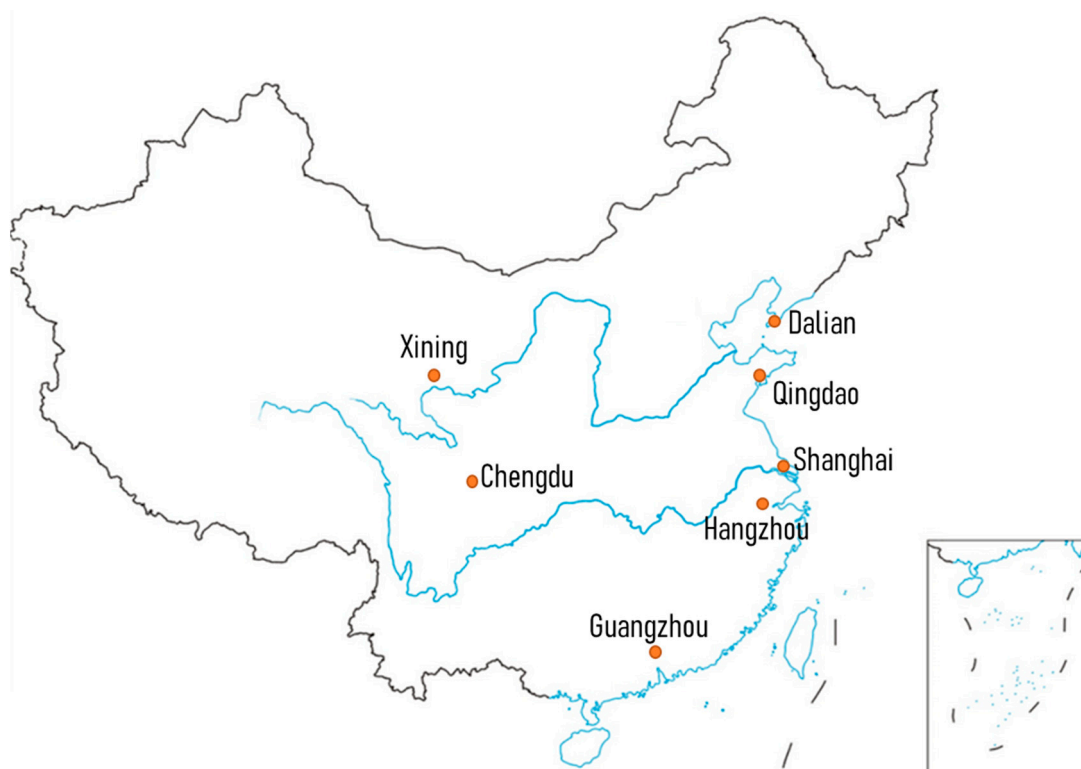

**Figure S1.** The map of sampling areas in China, including Chengdu, Xining, Dalian, Qingdao, Guangzhou, Hangzhou, and Shanghai.

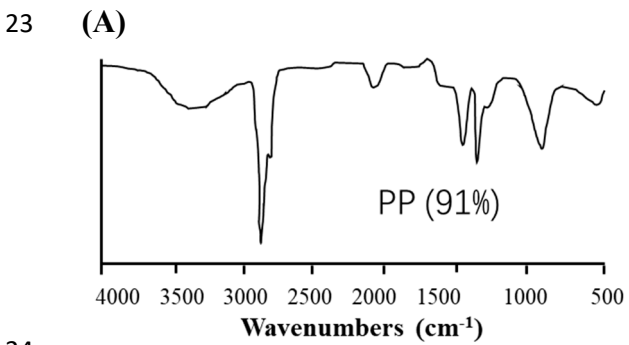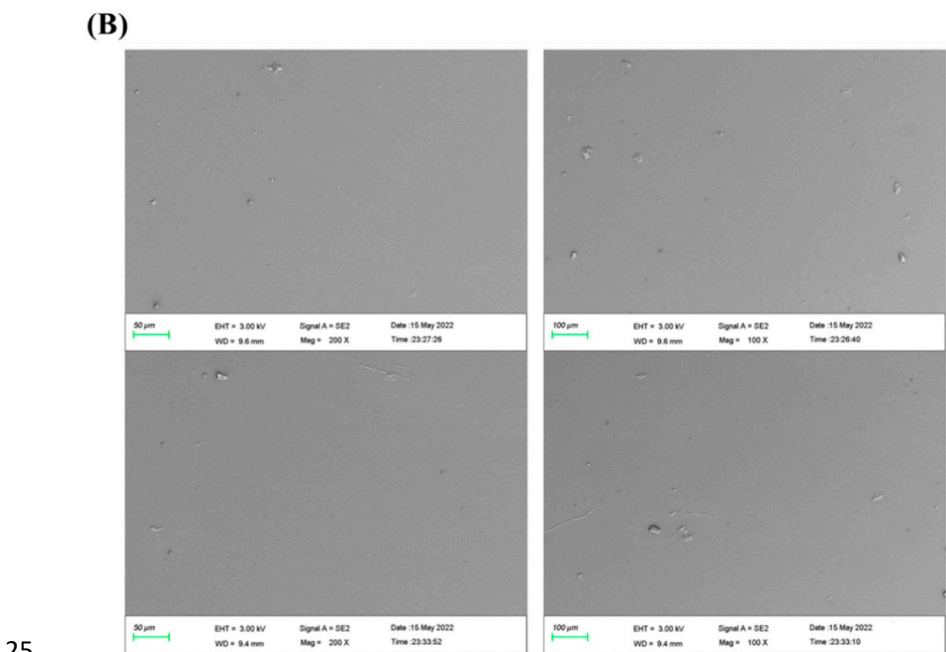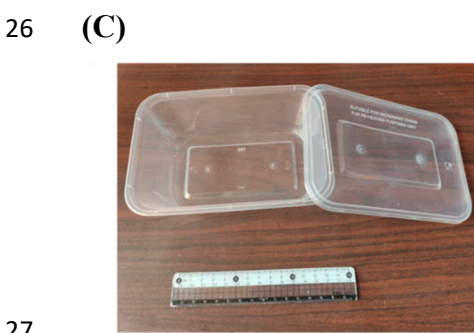

28 **Figure S2.** (A) A typical FT-IR spectrum of a TOFC sample. (B) SEM images of the  
29 inner surface of TOFCs. (C) A typical TOFC sample collected in this study.

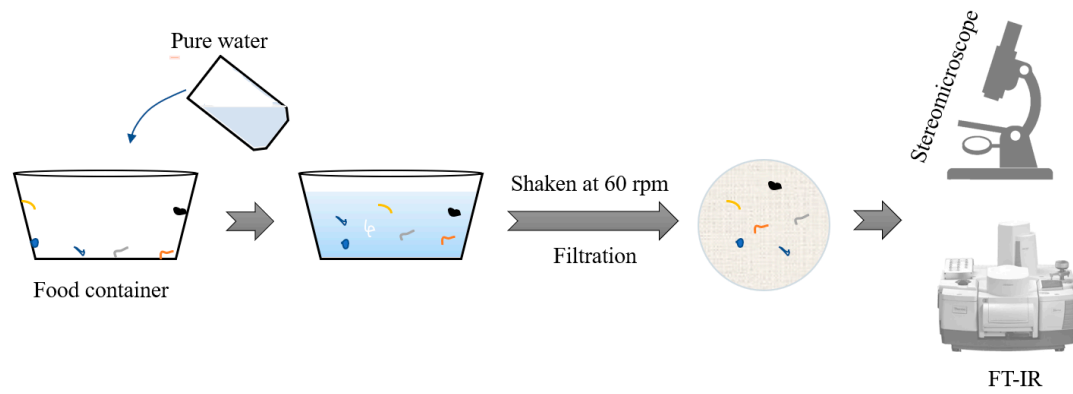

30

31 **Figure S3.** The TOFC sample processing diagram.

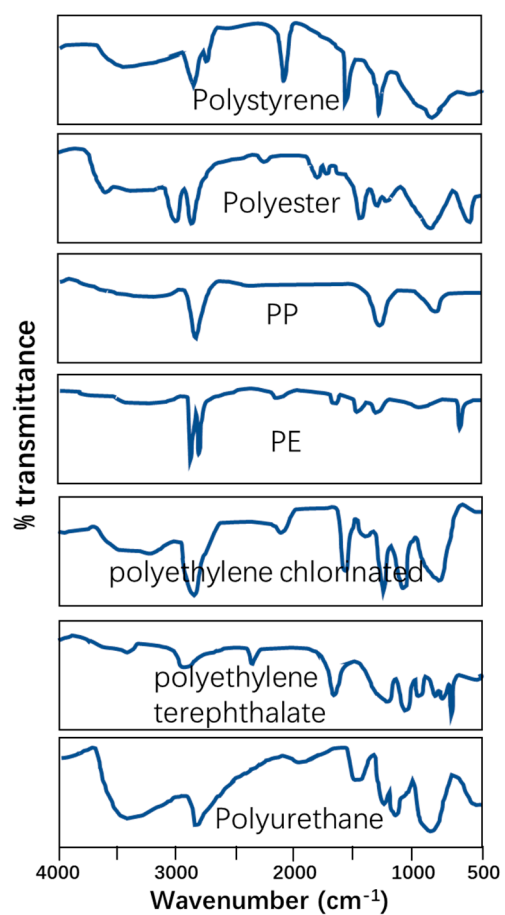

32

33 **Figure S4.** Typical FT-IR spectra of the polymers of MPs detected in TOFCs.
